# Supplementary material for: Genomic Analysis of Circulating Tumor DNA in 3,334 Patients with Advanced Prostate Cancer Identifies Targetable BRCA Alterations and AR Resistance Mechanisms
Source: Oxford University Press journal article supplement (doi:10.1158/1078-0432.ccr-20-4805), 2021-02-08
Supplement: 10780432ccr204805-sup-257098_2_supp_6889203_qnvl0h.docx [file 10780432ccr204805-sup-257098_2_supp_6889203_qnvl0h.docx]

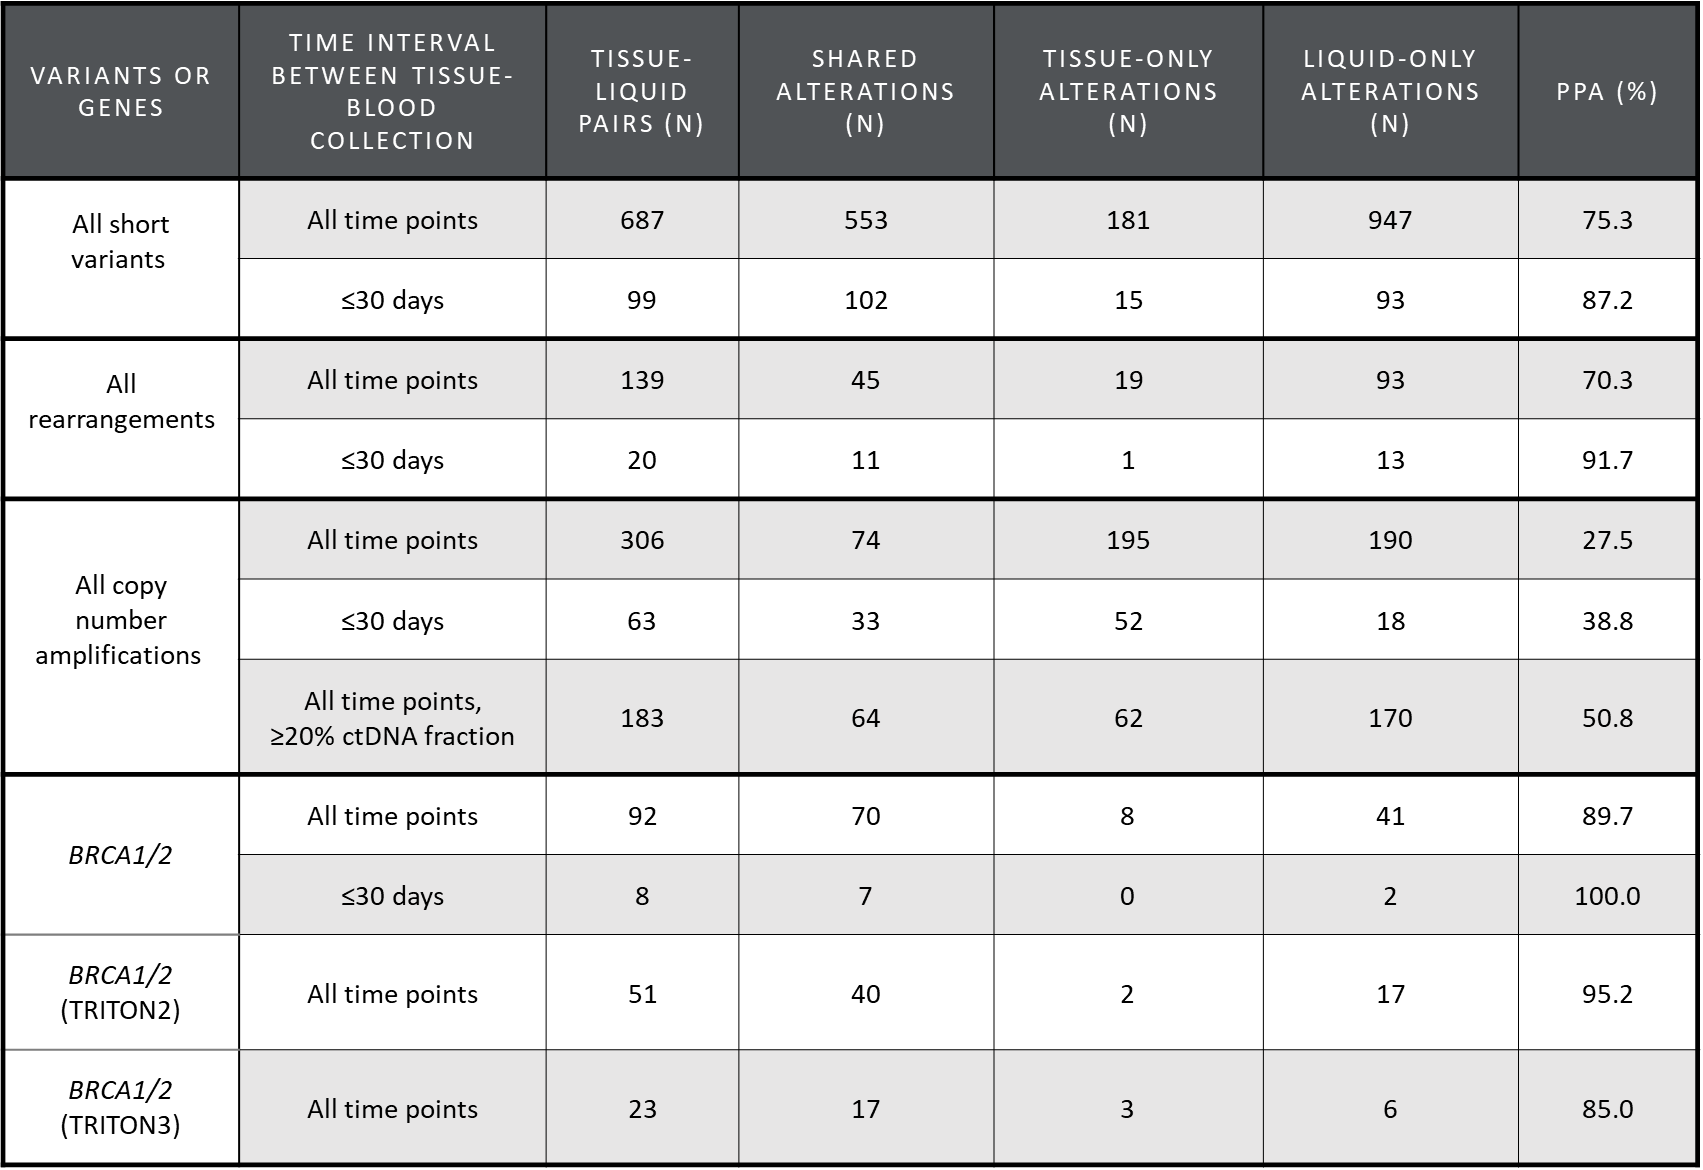


**Table S3. Positive percent agreement (PPA) between patient-matched cancer tissue and liquid biopsies.** Short variants, rearrangements, and copy number alterations considered separately. PPA of *BRCA1/2* includes short variants and rearrangements also presented. PPA = shared alterations / (shared alterations + tissue only alterations).
